# Supplementary material for: Solar Photocatalytic Membranes: An Experimental and Artificial Neural Network Modeling Approach for Niflumic Acid Degradation
Source: MDPI journal article supplement (doi:10.3390/membranes12090849), 2022-08-30
Supplement: s1 [file s1]

# Solar photocatalytic degradation of niflumic acid using a TiO<sub>2</sub>/PVDF–TrFE nanocomposite membrane: artificial neural network modeling

L. Aoudjit<sup>1†</sup>, H. Salazar<sup>2, 3†\*</sup>, D. Zioui<sup>3</sup>, A. Sebt<sup>3</sup>, P. M. Martins<sup>4, 5</sup>, and S. Lanceros-

Méndez<sup>6, 7\*</sup>

<sup>1</sup>Unité de Développement des équipements Solaires, UDES /Centre de Développement des Energies  
Renouvelables, CDER, Bou Ismail, 42415, W. Tipaza, Algérie

<sup>2</sup>Centre/Department of Physics, University of Minho, Campus de Gualtar, 4710-057 Braga, Portugal

<sup>3</sup>Centre/Department of Chemistry, University of Minho, Campus de Gualtar, 4710-057 Braga, Portugal

<sup>4</sup>Centre of Molecular and Environmental Biology, University of Minho, Campus de Gualtar, 4710-057  
Braga, Portugal

<sup>5</sup>Institute of Science and Innovation on Bio-Sustainability (IB-S), University of  
Minho, 4710-057, Braga, Portugal

<sup>6</sup>BCMaterials, Basque Centre for Materials, Applications and Nanostructures, UPV/EHU Science Park,  
48940 Leioa, Spain

<sup>7</sup>IKERBASQUE, Basque Foundation for Science, 48013 Bilbao, Spain

## Supporting Information

### 1. Supporting information for sub-chapter 3.

**Table S1.** Process variables and their operating range.

| Experimental variable                   | Operating range |
|-----------------------------------------|-----------------|
| Initial NFA concentration (mg/L)        | 10 – 30         |
| pH                                      | 3 - 9           |
| Irradiation time (h)                    | 0 -6            |
| Radiation intensity (W/m <sup>2</sup> ) | 269 - 925       |

## 2. Supporting information for sub-chapter 4.1.

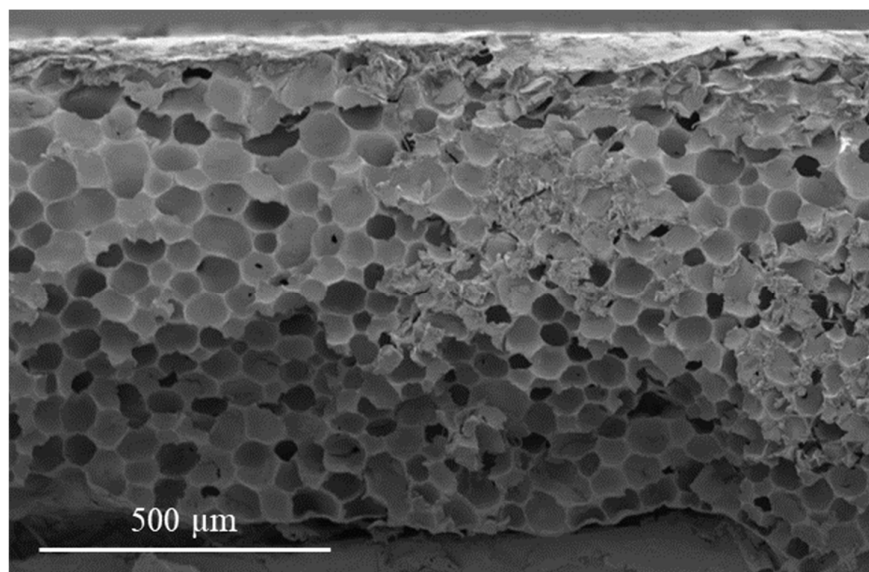

**Figure S1.** Representative SEM cross-section image of PVDF-TrFE membrane.

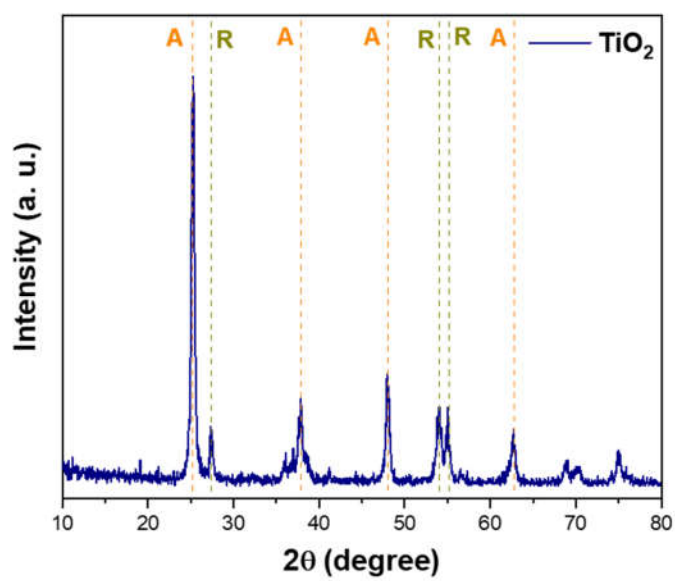

**Figure S2.** XRD pattern of TiO<sub>2</sub> nanoparticles.

### 3. Supporting information for sub-chapter 4.2.

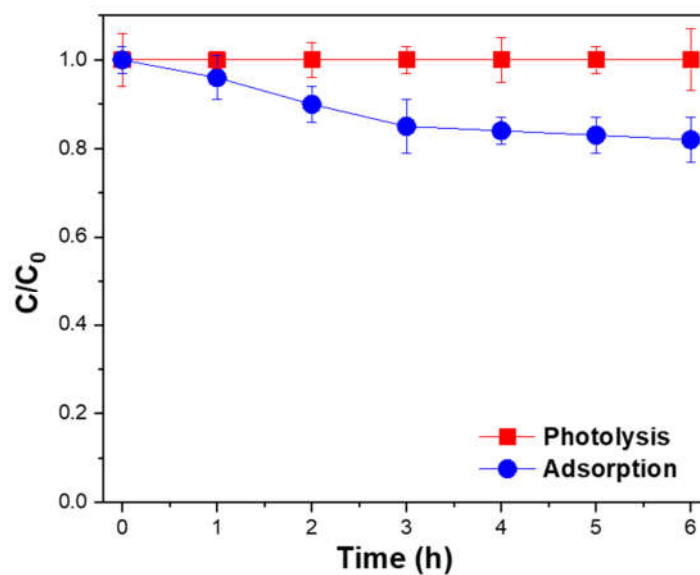

Figure S3. Effect of photolysis and adsorption processes on NFA degradation.

### 4. Supporting information for sub-chapter 4.2.1.

Table S2. Effect of initial NFA concentration on photocatalytic degradation efficiency and rate constant.

| $C_0$ (mg/L) | Efficiency (%) | Rate constant ( $\text{min}^{-1}$ ) | $R^2$ |
|--------------|----------------|-------------------------------------|-------|
| 10           | 91             | 0.28                                | 0.93  |
| 20           | 76             | 0.17                                | 0.95  |
| 30           | 59             | 0.11                                | 0.94  |

## 5. Supporting information for sub-chapter 4.5.

**Table S3.** Weight and bias matrix of the ANN model.

| Weights and bias: Input layer – Hidden layer |                 |          |          |                                            |          | Weights and bias: Hidden layer – Output layer |          |          |
|----------------------------------------------|-----------------|----------|----------|--------------------------------------------|----------|-----------------------------------------------|----------|----------|
| Neuron                                       | Inputs          |          |          |                                            | Bias     | Neuron                                        | Weights  | Bias     |
|                                              | [NFA]<br>(mg/L) | pH       | Time (h) | Radiation<br>intensity (W/m <sup>2</sup> ) |          |                                               |          |          |
| <b>1</b>                                     | - 0,5071        | - 0,0503 | - 3,0541 | 0,1888                                     | - 2,7232 | <b>1</b>                                      | - 0,5788 | - 0,3796 |
| <b>2</b>                                     | 0,0970          | - 1,8525 | - 0,9105 | - 0,2183                                   | 2,1129   | <b>2</b>                                      | 0,5938   |          |
| <b>3</b>                                     | 0,7826          | 1,1945   | 0,4955   | - 2,0058                                   | - 0,6591 | <b>3</b>                                      | - 0,1363 |          |
| <b>4</b>                                     | - 1,9199        | - 0,3599 | 1,3549   | 1,1247                                     | 0,9924   | <b>4</b>                                      | 0,1971   |          |
| <b>5</b>                                     | - 0,3115        | 1,0535   | - 1,2946 | 1,2275                                     | - 0,0473 | <b>5</b>                                      | - 0,2787 |          |
| <b>6</b>                                     | 0,0291          | 2,8858   | 3,6648   | 1,1251                                     | - 1,9884 | <b>6</b>                                      | 0,7312   |          |
| <b>7</b>                                     | - 1,6460        | 0,6069   | 0,3122   | - 1,5249                                   | - 1,8305 | <b>7</b>                                      | 0,1854   |          |
| <b>8</b>                                     | - 1,3610        | - 1,8650 | 1,7781   | - 1,0967                                   | - 2,4857 | <b>8</b>                                      | 0,0376   |          |
